# Supplementary material for: Efficacy of cell-free DNA methylation-based blood test for colorectal cancer screening in high-risk population: a prospective cohort study
Source: Springer Nature journal article supplement (doi:10.1186/s12943-023-01866-z), 2023-09-28
Supplement: MOESM1 [file 26100552]

## **Supplementary Materials for**

### **Efficacy of cell-free DNA methylation-based blood test for colorectal cancer screening in high-risk population: a prospective cohort study**

Fuqiang Zhao<sup>1,8</sup>, Ping Bai<sup>2,8</sup>, Jianfeng Xu<sup>3,8</sup>, Zitong Li<sup>4,8</sup>, Shan Muhammad<sup>4</sup>, Diange Li<sup>3</sup>, Zeyue Zhang<sup>3</sup>, Yibo Gao<sup>4-7\*</sup>, Qian Liu<sup>1\*</sup>

Correspondence to: [gaoyibo@cicams.ac.cn](mailto:gaoyibo@cicams.ac.cn) (Y. G.) and [liuqian@cicams.ac.cn](mailto:liuqian@cicams.ac.cn) (Q. L.)

#### **This PDF file includes:**

Supplementary Figs. S1 to S3

Supplementary table S1 to S11

# Supplementary Figures

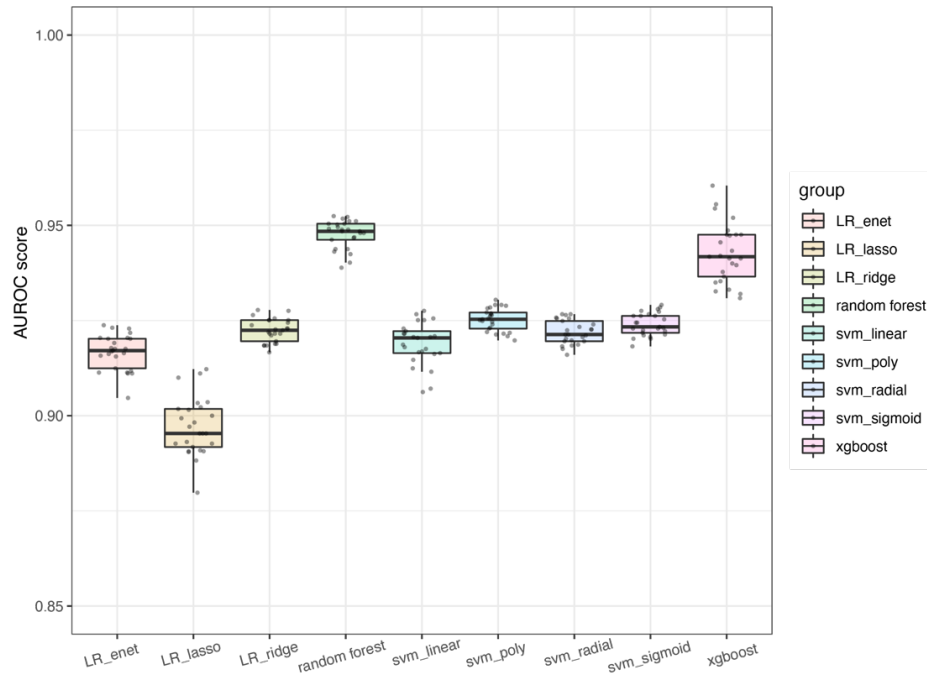

**Supplementary Figure S1. Comparison of machine learning models for CRC detection by cross-validation in training set.**

**A**

| Training set | Sensitivity (95% CI, %) | Specificity (95% CI, %) |
|--------------|-------------------------|-------------------------|
| ColonSecure  | 85.3 (78.8-90.1)        | 90.0 (84.2-93.9)        |
| CEA          | 49.3 (41.4-57.2)        | 90.0 (84.2-93.9)        |
| CRP          | 57.3 (49.3-64.9)        | 90.0 (84.2-93.9)        |
| CA19-9       | 39.3 (31.8-47.3)        | 90.0 (84.2-93.9)        |

**B**

| Test set    | Sensitivity (95% CI, %) | Specificity (95% CI, %) |
|-------------|-------------------------|-------------------------|
| ColonSecure | 87.0 (74.4-93.9)        | 90.0 (78.6-95.7)        |
| CEA         | 58.7 (44.3-71.7)        | 90.0 (78.6-95.7)        |
| CRP         | 41.3 (28.3-55.7)        | 90.0 (78.6-95.7)        |
| CA19-9      | 34.8 (22.7-49.3)        | 90.0 (78.6-95.7)        |

**Supplementary Figure S2. Developing cfDNA methylation-based model for CRC detection.** The sensitivity and specificity of the methylation model and protein biomarkers for training set (A) and test set (B).

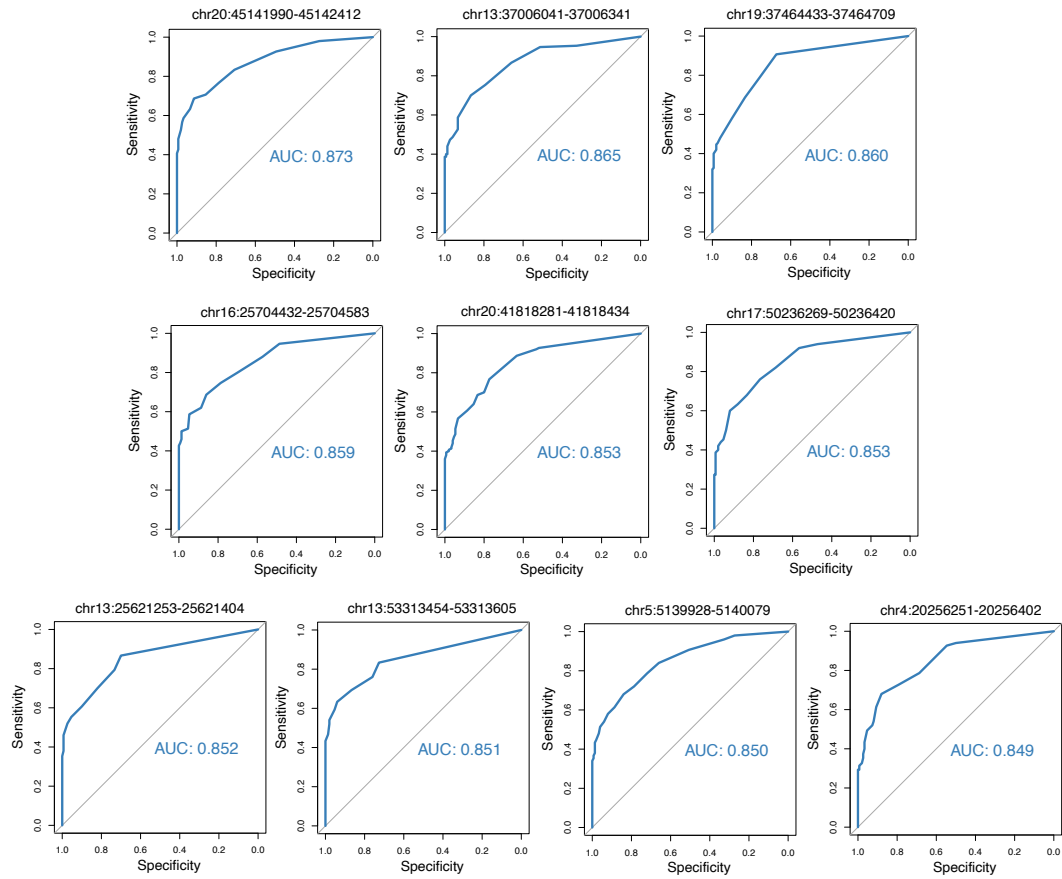

**Supplementary Figure S3. ROC plot for top 10 methylation markers used for the methylation model construction.**

## Supplementary Tables

**Table S1** Clinical characteristics of the case-control samples for marker discovery

|                                | CRC        | Non-cancer subjects |
|--------------------------------|------------|---------------------|
| <b>Subjects (n)</b>            | 71         | 74                  |
| <b>Age, median, years</b>      | 66         | 59                  |
| <b>Sex</b>                     |            |                     |
| Male (n)                       | 41 (57.7%) | 31 (41.9%)          |
| Female (n)                     | 30 (42.3%) | 43 (58.1%)          |
| <b>Stage</b>                   |            |                     |
| I                              | 9 (12.7%)  |                     |
| II                             | 11 (15.5%) |                     |
| III                            | 25 (35.2%) |                     |
| IV                             | 26 (36.6%) |                     |
| <b>Non-cancer conditions</b>   |            |                     |
| Family history of CRC          | NA         | 21 (28.4%)          |
| Adenoma or history of adenoma  | NA         | 39 (52.7%)          |
| Inflammatory bowel disease     | NA         | 20 (27.0%)          |
| Familial adenomatous polyposis | NA         | 3 (4.1%)            |

**Table S2** Clinical characteristics of the case-control samples for model construction

|                                | CRC         | Non-cancer subjects |
|--------------------------------|-------------|---------------------|
| <b>Subjects (n)</b>            | 196         | 200                 |
| <b>Age, median, years</b>      | 61          | 60                  |
| <b>Sex</b>                     |             |                     |
| Male (n)                       | 120 (61.2%) | 121 (60.5%)         |
| Female (n)                     | 76 (38.8%)  | 79 (39.5%)          |
| <b>Stage</b>                   |             |                     |
| 0                              | 4 (2.0%)    |                     |
| I                              | 12 (6.1%)   |                     |
| II                             | 18 (9.2%)   |                     |
| III                            | 52 (26.5%)  |                     |
| IV                             | 42 (21.4%)  |                     |
| Unstaged or unknown            | 68 (34.7%)  |                     |
| <b>Non-cancer conditions</b>   |             |                     |
| Family history of CRC          | NA          | 40 (20.0%)          |
| Adenoma or history of adenoma  | NA          | 146 (73.0%)         |
| Inflammatory bowel disease     | NA          | 43 (21.5%)          |
| Familial adenomatous polyposis | NA          | 5 (2.5%)            |

**Table S3** Clinical characteristics of the prospective cohort for CRC screening

|                                | <b>CRC</b> | <b>Non-cancer subjects</b> |
|--------------------------------|------------|----------------------------|
| <b>Subjects (n)</b>            | 103        | 3390                       |
| <b>Age, median, years</b>      | 62         | 54                         |
| <b>Sex</b>                     |            |                            |
| Male (n)                       | 57 (55.3%) | 1723 (50.8%)               |
| Female (n)                     | 46 (44.7%) | 1667 (49.2%)               |
| <b>Stage</b>                   |            |                            |
| 0                              | 3 (3.0%)   |                            |
| I                              | 12 (11.7%) |                            |
| II                             | 25 (24.3%) |                            |
| III                            | 36 (35.0%) |                            |
| IV                             | 10 (9.7%)  |                            |
| Unstaged or unknown            | 17 (16.5%) |                            |
| <b>Non-cancer conditions</b>   |            |                            |
| Family history of CRC          | NA         | 281 (8.3%)                 |
| Adenoma or history of adenoma  | NA         | 2259 (66.7%)               |
| Inflammatory bowel disease     | NA         | 531 (15.7%)                |
| Familial adenomatous polyposis | NA         | 13 (0.4%)                  |

**Table S4** Characteristics of the top 10 methylation markers used in the CRC prediction model

| <b>Marker ID</b> | <b>Chr</b> | <b>Start</b> | <b>End</b> | <b>Gene Name</b> | <b>Annotation</b> | <b>Distance to TSS</b> | <b>AUC</b> | <b>Sensitivity at 90% specificity</b> |
|------------------|------------|--------------|------------|------------------|-------------------|------------------------|------------|---------------------------------------|
| <b>CRC_1</b>     | chr20      | 45141990     | 45142412   | ZNF334           | promoter          | -3                     | 0.873      | 68.7%                                 |
| <b>CRC_2</b>     | chr13      | 37006041     | 37006341   | CCNA1            | promoter          | -218                   | 0.865      | 58.7%                                 |
| <b>CRC_3</b>     | chr19      | 37464433     | 37464709   | ZNF568           | intron            | 57340                  | 0.860      | 58.0%                                 |
| <b>CRC_4</b>     | chr16      | 25704432     | 25704583   | HS3ST4           | intron            | 1161                   | 0.859      | 58.7%                                 |
| <b>CRC_5</b>     | chr20      | 41818281     | 41818434   | PTPRT            | exon              | 199                    | 0.853      | 56.7%                                 |
| <b>CRC_6</b>     | chr17      | 50236269     | 50236420   | CA10             | promoter          | -213                   | 0.853      | 60.0%                                 |
| <b>CRC_7</b>     | chr13      | 25621253     | 25621404   | PABPC3           | Intergenic        | -48947                 | 0.852      | 60.7%                                 |
| <b>CRC_8</b>     | chr13      | 53313454     | 53313605   | LECT1            | intron            | 417                    | 0.851      | 63.3%                                 |
| <b>CRC_9</b>     | chr5       | 5139928      | 5140079    | CTD-2297D10.2    | promoter          | 163                    | 0.850      | 58.0%                                 |
| <b>CRC_10</b>    | chr4       | 20256251     | 20256402   | SLIT2            | intron            | 1140                   | 0.849      | 61.3%                                 |

**Table S5** Prediction performance of the methylation model in prospective CRC high-risk cohort

| Methylation model  | Participants | Predicted Positive | Predicted Negative | Sensitivity (95% CI,%) | Specificity (95% CI, %) |
|--------------------|--------------|--------------------|--------------------|------------------------|-------------------------|
| CRC (Stage I-II)   | 40           | 34                 | 6                  | 85.0 (70.9-92.9)       |                         |
| CRC (Stage III-IV) | 46           | 42                 | 4                  | 91.3 (79.7-96.6)       |                         |
| CRC (all Stages)   | 103          | 90                 | 13                 | 86.4 (78.5-91.7)       |                         |
| Colon adenoma      | 1735         | 179                | 1556               |                        | 89.7 (88.2-91.0)        |
| All non-Cancer     | 3390         | 376                | 3014               |                        | 90.7 (89.7-91.6)        |

**Table S6** Prediction performance of CEA in prospective CRC high-risk cohort

| CEA                | Participants | Predicted Positive | Predicted Negative | Sensitivity (95% CI,%) | Specificity (95% CI, %) |
|--------------------|--------------|--------------------|--------------------|------------------------|-------------------------|
| CRC (Stage I-II)   | 40           | 16                 | 24                 | 40.0 (26.4-55.4)       |                         |
| CRC (Stage III-IV) | 46           | 25                 | 21                 | 54.3 (40.1-67.8)       |                         |
| CRC (all Stages)   | 103          | 47                 | 56                 | 45.6 (36.3-55.2)       |                         |
| Colon adenoma      | 1735         | 173                | 1562               |                        | 90.0 (88.5-91.3)        |
| All non-Cancer     | 3390         | 315                | 3075               |                        | 90.7 (89.7-91.6)        |

**Table S7** Prediction performance of CRP in prospective CRC high-risk cohort

| CRP                | Participants | Predicted Positive | Predicted Negative | Sensitivity (95% CI,%) | Specificity (95% CI, %) |
|--------------------|--------------|--------------------|--------------------|------------------------|-------------------------|
| CRC (Stage I-II)   | 40           | 16                 | 24                 | 40.0 (26.4-55.4)       |                         |
| CRC (Stage III-IV) | 46           | 18                 | 28                 | 39.1 (26.4-53.5)       |                         |
| CRC (all Stages)   | 103          | 43                 | 60                 | 39.8 (30.9-49.5)       |                         |
| Colon adenoma      | 1735         | 166                | 1569               |                        | 90.4 (88.9-91.7)        |
| All non-Cancer     | 3390         | 315                | 3075               |                        | 90.7 (89.7-91.6)        |

**Table S8** Prediction performance of CA19-9 in prospective CRC high-risk cohort

| CA19-9             | Participants | Predicted Positive | Predicted Negative | Sensitivity (95% CI,%) | Specificity (95% CI, %) |
|--------------------|--------------|--------------------|--------------------|------------------------|-------------------------|
| CRC (Stage I-II)   | 40           | 10                 | 30                 | 25.0 (14.2-40.2)       |                         |
| CRC (Stage III-IV) | 46           | 12                 | 34                 | 26.1 (15.6-40.3)       |                         |
| CRC (all Stages)   | 103          | 26                 | 77                 | 25.2 (17.8-34.4)       |                         |
| Colon adenoma      | 1735         | 175                | 1560               |                        | 90.0 (88.5-91.3)        |
| All non-Cancer     | 3390         | 314                | 3076               |                        | 90.7 (89.7-91.6)        |

**Table S9** Confounding factor analysis for the ColonSecure test

|                             | Coefficient | Standard Error | z       | P >  z    | Odds Ratio (OR) | OR Lower CI | OR Upper CI |
|-----------------------------|-------------|----------------|---------|-----------|-----------------|-------------|-------------|
| <b>ColonSecure Result</b>   | 12.484      | 0.912          | 13.685  | 1.255E-42 | 2.640E5         | 4.826E4     | 1.737E6     |
| <b>Intercept</b>            | -13.987     | 1.050          | -13.323 | 1.711E-40 | 8.426E-7        | 9.549E-8    | 5.901E-6    |
| <b>Patient Demographics</b> |             |                |         |           |                 |             |             |
| Age                         | 0.035       | 0.012          | 2.831   | 4.640E-3  | 1.035           | 1.011       | 1.061       |
| Sex (male)                  | 0.189       | 0.253          | 0.750   | 0.453     | 1.209           | 0.737       | 1.990       |
| <b>Tumor site: R vs L</b>   | -0.392      | 0.274          | -1.432  | 0.152     | 0.676           | 0.391       | 1.146       |

**Table S10** Permutation-based Wilcoxon signed-rank test P values for comparison of test AUROC

|                                   | CEA     | CRP     | CA19-9  |
|-----------------------------------|---------|---------|---------|
| <b>Training set</b>               |         |         |         |
| ColonSecure                       | < 0.001 | < 0.001 | < 0.001 |
| <b>Test set</b>                   |         |         |         |
| ColonSecure                       | < 0.001 | < 0.001 | < 0.001 |
| <b>Prospective validation set</b> |         |         |         |
| ColonSecure                       | < 0.001 | < 0.001 | < 0.001 |

**Table S11** McNemar's test P values for comparison of test sensitivity

|                                                 | CEA     | CRP     | CA19-9  |
|-------------------------------------------------|---------|---------|---------|
| <b>Training set</b>                             |         |         |         |
| ColonSecure                                     | 4.5E-08 | 8.1E-13 | 4.2E-14 |
| <b>Test set</b>                                 |         |         |         |
| ColonSecure                                     | 0.012   | 6.3E-05 | 1.4E-05 |
| <b>Prospective validation set</b>               |         |         |         |
| ColonSecure                                     | 6.7E-09 | 3.3E-10 | 4.0E-13 |
| <b>Prospective validation set (early stage)</b> |         |         |         |
| ColonSecure                                     | 2.9E-04 | 1.8E-04 | 6.5E-06 |
